# Supplementary material for: Kingpins, Bottlenecks, and Value Dynamics Along a Sector
Source: Atypon-hosted journal article supplement (doi:10.1287/orsc.2014.0958), 2015-03-02
Supplement: orsc.2014.0958-sm-appendix-jennfinal.pdf [file orsc.2014.0958-sm-appendix-jennfinal.pdf]

**Data Appendix 1. A bird's eye view of data.**

| Year   | 1980  |         |               |              | 1985  |         |               |              | 1990  |         |               |              |
|--------|-------|---------|---------------|--------------|-------|---------|---------------|--------------|-------|---------|---------------|--------------|
|        | Firms | Segment | Kingpin(mcap) | Kingpin(R&D) | Firms | Segment | Kingpin(mcap) | Kingpin(R&D) | Firms | Segment | Kingpin(mcap) | Kingpin(R&D) |
| 333290 | 1     | 1.4E-06 | 1             |              | 2     | 1.5E-04 | 1             | 1            | 2     | 2.2E-04 | 0.902         | 0.619        |
| 333310 | 3     | 0.077   | 0.806         | 0.889        | 5     | 0.045   | 0.643         | 0.708        | 7     | 0.052   | 0.674         | 0.566        |
| 334110 | 85    | 0.776   | 0.627         | 0.514        | 194   | 0.821   | 0.580         | 0.316        | 194   | 0.693   | 0.464         | 0.246        |
| 334210 | 1     |         |               |              | 2     | 0.002   | 1             | 1            | 7     | 0.001   | 0.480         | 0.719        |
| 334220 | 1     | 1.0E-05 | 1             | 1            | 2     | 2.4E-06 | 0.978         | 0.976        | 2     | 4.6E-05 | 0.976         | 0.604        |
| 334290 |       |         |               |              |       |         |               |              | 1     | 3.1E-04 | 1             | 1            |
| 334310 | 3     | 9.6E-05 | 0.862         | 0.985        | 4     | 7.8E-05 | 0.993         | 0.992        | 1     | 0.012   | 1             | 1            |
| 334410 | 47    | 0.061   | 0.346         | 0.284        | 74    | 0.055   | 0.309         | 0.202        | 83    | 0.065   | 0.589         | 0.283        |
| 334510 | 9     | 0.020   | 0.662         | 0.434        | 12    | 0.005   | 0.535         | 0.536        | 10    | 0.002   | 0.821         | 0.868        |
| 334610 |       |         |               |              | 10    | 0.002   | 0.380         | 0.788        | 3     | 0.003   | 0.716         | 0.477        |
| 335910 |       |         |               |              |       |         |               |              |       |         |               |              |
| 335990 | 1     | 1.5E-04 | 1             | 1            | 2     | 9.7E-05 | 0.648         | 0.624        | 2     | 1.5E-04 | 0.610         | 0.653        |
| 339930 |       |         |               |              |       |         |               |              |       |         |               |              |
| 423430 |       |         |               |              |       |         |               |              |       |         |               |              |
| 423690 | 1     |         |               |              | 2     | 3.8E-07 | 1             |              |       |         |               |              |
| 425110 | 1     |         |               |              | 3     | 2.0E-04 | 0.573         |              | 6     | 2.7E-04 | 0.613         | 1            |
| 443120 |       |         |               |              |       |         |               |              | 1     | 3.9E-04 | 1             | 1            |
| 454110 |       |         |               |              |       |         |               |              | 2     | 2.2E-05 | 1             |              |
| 511210 | 19    | 0.028   | 0.738         | 0.816        | 74    | 0.020   | 0.140         | 0.122        | 113   | 0.117   | 0.363         | 0.131        |
| 516110 |       |         |               |              |       |         |               |              | 1     | 9.6E-07 | 1             | 1            |
| 518110 |       |         |               |              | 2     | 1.2E-05 | 1             | 0.703        | 2     | 3.5E-06 | 1             | 1            |
| 518210 | 5     | 0.009   | 0.997         | 0.988        | 11    | 0.011   | 0.923         | 0.611        | 12    | 0.022   | 0.880         | 0.571        |
| 532420 | 4     | 0.002   | 0.901         |              | 7     | 0.005   | 0.838         | 1            | 7     | 0.004   | 0.719         | 1            |
| 534420 | 1     |         |               |              |       |         |               |              |       |         |               |              |
| 541330 | 3     | 0.001   | 0.496         | 1            | 5     | 3.7E-04 | 0.426         | 0.734        | 4     | 2.1E-04 | 0.504         | 0.751        |
| 541430 |       |         |               |              |       |         |               |              |       |         |               |              |
| 541510 | 35    | 0.026   | 0.161         | 0.190        | 98    | 0.030   | 0.147         | 0.173        | 105   | 0.027   | 0.326         | 0.211        |
| 541710 |       |         |               |              | 1     | 2.2E-04 | 1             | 1            | 4     | 2.4E-05 | 0.824         | 0.498        |
| 541850 |       |         |               |              |       |         |               |              |       |         |               |              |
| 541890 |       |         |               |              |       |         |               |              |       |         |               |              |
| 541990 |       |         |               |              |       |         |               |              |       |         |               |              |
| 561490 |       |         |               |              |       |         |               |              |       |         |               |              |
| 611420 |       |         |               |              |       |         |               |              | 1     | 3.8E-06 | 1             | 1            |
| 811210 |       |         |               |              | 1     | 3.0E-05 | 1             |              | 1     | 3.5E-05 | 1             |              |

**Data Appendix 1 (cont'd). A bird's eye view of data.**

| Year   | 1995  |         |               |              | 2000  |         |               |              | 2005  |         |               |              |
|--------|-------|---------|---------------|--------------|-------|---------|---------------|--------------|-------|---------|---------------|--------------|
|        | Firms | Segment | Kingpin(mcap) | Kingpin(R&D) | Firms | Segment | Kingpin(mcap) | Kingpin(R&D) | Firms | Segment | Kingpin(mcap) | Kingpin(R&D) |
| 333290 | 4     | 0.001   | 0.681         | 0.922        | 2     | 1.4E-04 | 0.994         | 0.997        | 2     | 0.002   | 0.998         | 0.998        |
| 333310 | 6     | 0.041   | 0.534         | 0.536        | 1     | 2.5E-08 | 1             | 1            | 1     | 0.014   | 1             | 1            |
| 334110 | 273   | 0.413   | 0.177         | 0.204        | 243   | 2.9E-01 | 0.361         | 0.160        | 146   | 0.188   | 0.302         | 0.187        |
| 334210 | 10    | 0.003   | 0.381         | 0.987        | 7     | 4.2E-03 | 0.724         | 0.593        | 1     |         |               | 1            |
| 334220 | 8     | 0.001   | 0.475         | 0.459        | 5     | 1.2E-05 | 0.474         | 0.654        | 4     | 3.1E-05 | 0.796         | 0.995        |
| 334290 |       |         |               |              | 1     |         |               | 1            |       |         |               |              |
| 334310 | 2     | 0.007   | 0.636         | 0.565        | 2     | 3.0E-06 | 0.761         | 1            |       |         |               |              |
| 334410 | 145   | 0.184   | 0.371         | 0.393        | 198   | 0.265   | 0.204         | 0.166        | 168   | 0.267   | 0.287         | 0.193        |
| 334510 | 9     | 4.9E-04 | 0.512         | 0.972        | 7     | 2.5E-04 | 0.957         | 0.799        | 2     | 3.8E-08 | 1             | 1            |
| 334610 | 11    | 0.003   | 0.288         | 0.329        | 3     | 4.4E-05 | 0.754         | 0.604        |       |         |               |              |
| 335910 | 1     | 1.2E-04 | 1             | 1            | 1     | 4.0E-05 | 1             | 1            | 1     | 1.8E-04 | 1             | 1            |
| 335990 | 2     | 2.7E-05 | 0.758         | 0.920        | 3     | 8.4E-06 | 0.675         | 0.770        | 1     |         |               | 1            |
| 339930 | 2     | 1.3E-04 | 0.968         | 0.966        |       |         |               |              | 2     | 0.001   | 1             | 0.980        |
| 423430 |       |         |               |              | 6     | 9.5E-06 | 0.510         | 0.841        | 3     | 7.0E-07 | 0.881         | 0.905        |
| 423690 |       |         |               |              | 2     | 2.5E-06 | 0.723         | 1            |       |         |               |              |
| 425110 | 16    | 3.3E-04 | 0.437         | 0.898        | 9     | 4.6E-05 | 0.509         | 1.000        | 1     | 1.4E-06 | 1             |              |
| 443120 |       |         |               |              |       |         |               |              | 1     | 0.001   | 1             | 1            |
| 454110 | 10    | 0.004   | 0.410         | 0.646        | 28    | 0.004   | 0.556         | 0.732        | 25    | 0.016   | 0.627         | 0.898        |
| 511210 | 364   | 0.256   | 0.295         | 0.229        | 571   | 0.320   | 0.255         | 0.200        | 319   | 0.245   | 0.443         | 0.252        |
| 516110 |       |         |               |              |       |         |               |              |       |         |               |              |
| 518110 | 16    | 0.001   | 0.405         | 0.481        | 175   | 0.027   | 0.240         | 0.105        | 121   | 0.145   | 0.441         | 0.235        |
| 518210 | 17    | 0.046   | 0.478         | 0.737        | 30    | 0.025   | 0.338         | 0.659        | 35    | 0.038   | 0.420         | 0.832        |
| 532420 | 7     | 0.002   | 0.718         |              | 7     | 4.7E-04 | 0.632         | 0.612        | 3     | 4.8E-04 | 0.757         |              |
| 534420 |       |         |               |              |       |         |               |              |       |         |               |              |
| 541330 | 1     | 7.2E-07 | 1             |              | 3     | 5.5E-08 | 0.971         | 0.999        |       |         |               |              |
| 541430 | 1     | 3.6E-06 | 1             | 1            | 3     | 5.8E-05 | 0.993         | 1            | 1     | 1.4E-04 | 1             |              |
| 541510 | 182   | 3.6E-02 | 0.159         | 0.340        | 323   | 0.056   | 0.154         | 0.188        | 190   | 0.080   | 0.244         | 0.306        |
| 541710 | 7     | 0.001   | 0.358         | 0.401        | 3     | 2.3E-05 | 0.911         | 0.869        | 1     | 5.4E-11 | 1             | 1            |
| 541850 |       |         |               |              | 2     | 1.2E-04 | 0.782         |              |       |         |               | 1            |
| 541890 | 1     | 5.3E-05 | 1             | 1            | 2     | 6.7E-05 | 1             | 1            | 2     | 4.0E-04 | 0.806         | 1            |
| 541990 |       |         |               |              | 1     | 3.3E-05 | 1             | 1            | 2     | 2.0E-07 | 0.740         |              |
| 561490 | 1     |         |               |              | 3     | 1.3E-05 | 0.967         | 0.777        | 2     | 2.4E-07 | 1             | 1            |
| 611420 | 3     | 1.7E-05 | 1             | 1            | 5     | 3.0E-06 | 0.800         | 1            | 2     | 3.1E-07 | 0.996         | 1            |
| 811210 | 3     | 2.7E-05 | 0.554         | 0.941        | 1     | 6.2E-08 | 1             | 1            | 1     | 9.4E-06 | 1             | 1            |

## Data Appendix 2a. Hypothesis testing: The effect of inequality, not logged variables.

| Discrepancy<br>xtreg, fe; IVs not logged | t=0                       |                           |                           |                           | t+1                       |                           |                           |                           | t+2                      |                          |                          |                          | t+3                       |                           |                           |                           |
|------------------------------------------|---------------------------|---------------------------|---------------------------|---------------------------|---------------------------|---------------------------|---------------------------|---------------------------|--------------------------|--------------------------|--------------------------|--------------------------|---------------------------|---------------------------|---------------------------|---------------------------|
|                                          | Controls                  | H1a                       | H2                        | Full                      | Controls                  | H1a                       | H2                        | Full                      | Controls                 | H1a                      | H2                       | Full                     | Controls                  | H1a                       | H2                        | Full                      |
| kingpin's share (R&D)                    |                           | .0037*<br>(1.54E-03)      |                           | .0032*<br>(1.61E-03)      |                           | .0042*<br>(1.66E-03)      |                           | .0033+<br>(1.71E-03)      |                          | .0048**<br>(1.76E-03)    |                          | .0036*<br>(1.80E-03)     |                           | .0064***<br>(1.84E-03)    |                           | .0051**<br>(1.89E-03)     |
| kingpin's share (market cap)             |                           |                           | 0.0024<br>(1.56E-03)      | 0.0017<br>(1.68E-03)      |                           |                           | .0045**<br>(1.67E-03)     | .004*<br>(1.79E-03)       |                          |                          | .0058***<br>(1.76E-03)   | .0054**<br>(1.88E-03)    |                           |                           | .0067***<br>(1.86E-03)    | .0058**<br>(1.99E-03)     |
| Herfindahl index of sales                | .0027**<br>(9.81E-04)     | 0.0009<br>(1.25E-03)      | 0.0013<br>(1.36E-03)      | 0.0001<br>(1.51E-03)      | .0022*<br>(1.08E-03)      | 0.0001<br>(1.37E-03)      | -0.0005<br>(1.48E-03)     | -0.0018<br>(1.64E-03)     | .0025*<br>(1.16E-03)     | 0.0001<br>(1.48E-03)     | -0.001<br>(1.58E-03)     | -0.0025<br>(1.76E-03)    | .0029*<br>(1.23E-03)      | -0.0003<br>(1.55E-03)     | -0.0011<br>(1.68E-03)     | -0.0031+<br>(1.85E-03)    |
| mean of R&D expenses                     | -2.05E-06<br>(3.55E-06)   | -2.09E-06<br>(3.59E-06)   | -1.94E-06<br>(3.67E-06)   | -2.01E-06<br>(3.71E-06)   | -3.27E-06<br>(4.06E-06)   | -3.23E-06<br>(4.10E-06)   | -3.22E-06<br>(4.17E-06)   | -3.22E-06<br>(4.22E-06)   | -2.44E-06<br>(4.42E-06)  | -2.37E-06<br>(4.45E-06)  | -2.52E-06<br>(4.53E-06)  | -2.49E-06<br>(4.57E-06)  | -4.34E-07<br>(4.63E-06)   | -3.37E-07<br>(4.63E-06)   | -5.50E-07<br>(4.73E-06)   | -4.83E-07<br>(4.76E-06)   |
| segment's mean of fixed assets           | -1.75E-07<br>(5.40E-07)   | -1.71E-07<br>(5.46E-07)   | -2.21E-07<br>(5.64E-07)   | -2.04E-07<br>(5.71E-07)   | -4.24E-10<br>(5.85E-07)   | 7.90E-09<br>(5.90E-07)    | -2.78E-08<br>(6.03E-07)   | -1.38E-08<br>(6.10E-07)   | -5.15E-09<br>(6.35E-07)  | 6.98E-09<br>(6.40E-07)   | -2.46E-08<br>(6.53E-07)  | -8.54E-09<br>(6.60E-07)  | -1.04E-07<br>(6.72E-07)   | -7.48E-08<br>(6.73E-07)   | -1.10E-07<br>(6.91E-07)   | -7.80E-08<br>(6.95E-07)   |
| segment's mean of entry cost             | -9.14E-08<br>(2.62E-07)   | -1.20E-07<br>(2.65E-07)   | -9.79E-08<br>(2.64E-07)   | -1.22E-07<br>(2.68E-07)   | -8.31E-08<br>(2.80E-07)   | -1.17E-07<br>(2.83E-07)   | -9.66E-08<br>(2.80E-07)   | -1.23E-07<br>(2.84E-07)   | -9.42E-08<br>(4.02E-07)  | -1.67E-07<br>(4.08E-07)  | -2.15E-07<br>(4.02E-07)  | -2.63E-07<br>(4.09E-07)  | -5.17E-08<br>(4.09E-07)   | -1.69E-07<br>(4.14E-07)   | -1.92E-07<br>(4.09E-07)   | -2.71E-07<br>(4.15E-07)   |
| number of firms                          | -5.56E-06<br>(4.89E-06)   | -3.81E-06<br>(4.99E-06)   | -5.81E-06<br>(4.93E-06)   | -4.19E-06<br>(5.05E-06)   | 3.95E-06<br>(5.27E-06)    | 5.90E-06<br>(5.37E-06)    | 3.43E-06<br>(5.28E-06)    | 5.01E-06<br>(5.41E-06)    | 1.20E-05*<br>(5.57E-06)  | 1.42E-05*<br>(5.67E-06)  | 1.12E-05*<br>(5.56E-06)  | 1.30E-05*<br>(5.69E-06)  | 2.32E-05***<br>(5.85E-06) | 2.61E-05***<br>(5.92E-06) | 2.23E-05***<br>(5.83E-06) | 2.48E-05***<br>(5.94E-06) |
| segment's sum of employees               | 1.56e-05***<br>(2.02E-06) | 1.54e-05***<br>(2.04E-06) | 1.59e-05***<br>(2.05E-06) | 1.57e-05***<br>(2.07E-06) | 1.05e-05***<br>(2.33E-06) | 1.03e-05***<br>(2.36E-06) | 1.10e-05***<br>(2.35E-06) | 1.08e-05***<br>(2.38E-06) | 5.31e-06*<br>(2.62E-06)  | 5.14e-06+<br>(2.64E-06)  | 6.14e-06*<br>(2.63E-06)  | 5.94e-06*<br>(2.66E-06)  | -2.09E-06<br>(2.91E-06)   | -2.38E-06<br>(2.92E-06)   | -1.12E-06<br>(2.91E-06)   | -1.47E-06<br>(2.93E-06)   |
| segment's mean of asset efficiency       | -4.30E-06<br>(8.25E-06)   | -2.01E-06<br>(8.44E-06)   | -2.42E-06<br>(8.41E-06)   | -9.39E-07<br>(8.59E-06)   | -3.88E-06<br>(8.74E-06)   | -1.25E-06<br>(8.94E-06)   | -3.95E-07<br>(8.85E-06)   | 1.26E-06<br>(9.04E-06)    | -4.37E-06<br>(9.07E-06)  | -1.34E-06<br>(9.27E-06)  | 2.12E-07<br>(9.15E-06)   | 2.15E-06<br>(9.36E-06)   | -5.10E-06<br>(9.34E-06)   | -1.22E-06<br>(9.50E-06)   | -2.55E-08<br>(9.40E-06)   | 2.42E-06<br>(9.58E-06)    |
| constant                                 | -0.0037***<br>(6.51E-04)  | -0.0055***<br>(9.57E-04)  | -0.0047***<br>(8.74E-04)  | -0.0059***<br>(1.06E-03)  | -0.0033***<br>(7.05E-04)  | -0.0052***<br>(1.02E-03)  | -0.005***<br>(9.32E-04)   | -0.0063***<br>(1.13E-03)  | -0.0032***<br>(7.57E-04) | -0.0053***<br>(1.08E-03) | -0.0053***<br>(9.80E-04) | -0.0068***<br>(1.19E-03) | -0.0031***<br>(8.01E-04)  | -0.0059***<br>(1.13E-03)  | -0.0055***<br>(1.03E-03)  | -0.0074***<br>(1.24E-03)  |
| N                                        | 573                       | 558                       | 563                       | 548                       | 537                       | 523                       | 530                       | 516                       | 504                      | 491                      | 497                      | 484                      | 473                       | 461                       | 466                       | 454                       |
| F                                        | 12.00                     | 11.00                     | 10.66                     | 9.74                      | 6.21                      | 6.13                      | 6.35                      | 5.97                      | 3.77                     | 4.17                     | 4.70                     | 4.61                     | 3.42                      | 4.48                      | 4.64                      | 4.97                      |
| p>F                                      | 0.000                     | 0.000                     | 0.000                     | 0.000                     | 0.000                     | 0.000                     | 0.000                     | 0.000                     | 0.000                    | 0.000                    | 0.000                    | 0.000                    | 0.000                     | 0.000                     | 0.000                     | 0.000                     |

Note. 'Kingpin's share (R&D)' and 'kingpin's share (market cap)' are the variables of interest (H1a and H2, respectively).

+(p<0.10), \*(p<0.05), \*\*(p<0.01), \*\*\*(p<0.001)

**Data appendix 2b. Hypothesis testing: The effect of inequality on the fringe firms in a segment.**

| DV: Segment's share of value<br>excluding that of the kingpin | xtreg, fe; IVs not logged |                          |                         |                          |
|---------------------------------------------------------------|---------------------------|--------------------------|-------------------------|--------------------------|
|                                                               | t=0                       | t+1                      | t+2                     | t+3                      |
| Kingpin's share (R&D)                                         | .077**<br>(2.51E-02)      | .0739**<br>(2.52E-02)    | .0664*<br>(2.61E-02)    | .0676*<br>(2.62E-02)     |
| Herfindahl index of sales                                     | -.0431*<br>(2.08E-02)     | -.045*<br>(2.11E-02)     | -.0387+<br>(2.21E-02)   | -.0397+<br>(2.24E-02)    |
| mean of R&D expenses                                          | -.0001**<br>(5.19E-05)    | -.0001*<br>(5.53E-05)    | -4.32E-05<br>(5.84E-05) | -4.78E-05<br>(5.83E-05)  |
| segment's mean of fixed assets                                | 2.50E-05**<br>(7.89E-06)  | 2.20E-05**<br>(7.96E-06) | 1.03E-05<br>(8.40E-06)  | 1.65E-05+<br>(8.47E-06)  |
| segment's mean of entry cost                                  | -2.75E-06<br>(9.14E-06)   | -2.22E-06<br>(9.14E-06)  | -5.19E-07<br>(1.27E-05) | -1.15E-06<br>(1.31E-05)  |
| number of firms                                               | -.0003**<br>(7.55E-05)    | -.0002**<br>(7.52E-05)   | -.0002*<br>(7.72E-05)   | -.0001<br>(7.69E-05)     |
| segment's sum of employees                                    | 1.08E-05<br>(3.28E-05)    | -5.94E-06<br>(3.49E-05)  | -5.27E-05<br>(3.78E-05) | -9.62E-05*<br>(3.95E-05) |
| segment's mean of asset efficiency                            | 0.0002<br>(1.23E-04)      | 0.0002<br>(1.21E-04)     | 0.0001<br>(1.22E-04)    | 0.0002<br>(1.20E-04)     |
| constant                                                      | .036*<br>(1.57E-02)       | .0405**<br>(1.56E-02)    | .0446**<br>(1.63E-02)   | .0451**<br>(1.62E-02)    |
| N                                                             | 430                       | 405                      | 381                     | 357                      |
| F                                                             | 5.14                      | 4.806                    | 3.536                   | 4.55                     |
| p>F                                                           | 0.000                     | 0.000                    | 0.000                   | 0.000                    |

Note. 'Kingpin's share (R&D)' is the variable of interest.

+(p<0.10), \*(p<0.05), \*\*(p<0.01), \*\*\*(p<0.001)

**Data appendix 2c. Reverse dynamics: The effect of a segment's share on the inequality within the segment.**

| DV: Kingpin's share (R&D)                   | xtreg, fe; IVs not logged |            |            | DV: Kingpin's share (market cap)            | xtreg, fe; IVs not logged |            |            |
|---------------------------------------------|---------------------------|------------|------------|---------------------------------------------|---------------------------|------------|------------|
|                                             | t+1                       | t+2        | t+3        |                                             | t+1                       | t+2        | t+3        |
| <b>segment's share of value in a sector</b> | .2542*                    | 0.1873     | 0.1509     | <b>segment's share of value in a sector</b> | .3183**                   | .211+      | 0.1606     |
|                                             | (0.11)                    | (0.12)     | (0.14)     |                                             | (0.11)                    | (0.12)     | (0.14)     |
| Herfindahl index of sales                   | .4018***                  | .3291***   | .2435***   | Herfindahl index of sales                   | .4747***                  | .3962***   | .2984***   |
|                                             | (0.03)                    | (0.04)     | (0.04)     |                                             | (0.03)                    | (0.04)     | (0.04)     |
| mean of R&D expenses                        | -.0003*                   | -.0005***  | -.0005***  | mean of R&D expenses                        | -8.30E-06                 | -0.0001    | -0.0002    |
|                                             | (1.21E-04)                | (1.35E-04) | (1.45E-04) |                                             | (1.26E-04)                | (1.37E-04) | (1.48E-04) |
| segment's mean of fixed assets              | 2.90E-05+                 | 5.02E-05*  | 5.71E-05** | segment's mean of fixed assets              | -4.30E-06                 | 1.20E-05   | 1.80E-05   |
|                                             | (1.75E-05)                | (1.94E-05) | (2.10E-05) |                                             | (1.85E-05)                | (2.00E-05) | (2.17E-05) |
| segment's mean of entry cost                | 1.16E-05                  | 1.22E-05   | 1.36E-05   | segment's mean of entry cost                | 6.85E-06                  | 1.59E-05   | -5.73E-06  |
|                                             | (8.54E-06)                | (1.45E-05) | (1.52E-05) |                                             | (8.44E-06)                | (1.24E-05) | (1.30E-05) |
| number of firms                             | -.0006***                 | -.0006**   | -.0004*    | number of firms                             | -1.33E-05                 | 1.25E-05   | 0.0001     |
|                                             | (1.61E-04)                | (1.75E-04) | (1.90E-04) |                                             | (1.63E-04)                | (1.78E-04) | (1.94E-04) |
| segment's sum of employees                  | 4.61E-05                  | 4.79E-05   | 1.51E-05   | segment's sum of employees                  | -0.0001                   | -0.0001    | -0.0001    |
|                                             | (6.97E-05)                | (8.00E-05) | (9.11E-05) |                                             | (7.06E-05)                | (8.11E-05) | (9.30E-05) |
| segment's mean of asset efficiency          | -.0005+                   | -0.0003    | -0.0002    | segment's mean of asset efficiency          | -0.0003                   | -.0005+    | -0.0003    |
|                                             | (2.63E-04)                | (2.80E-04) | (2.91E-04) |                                             | (2.64E-04)                | (2.80E-04) | (2.97E-04) |
| constant                                    | .4856***                  | .5219***   | .5589***   | constant                                    | .4183***                  | .4579***   | .512***    |
|                                             | (0.02)                    | (0.02)     | (0.03)     |                                             | (0.02)                    | (0.02)     | (0.03)     |
| N                                           | 515                       | 478        | 447        | N                                           | 528                       | 498        | 470        |
| F                                           | 25.386                    | 16.76      | 9.438      | F                                           | 29.56                     | 17.287     | 8.958      |
| p>F                                         | 0.000                     | 0.000      | 0.000      | p>F                                         | 0.000                     | 0.000      | 0.000      |

Note. 'Segment's share of value in a sector' is the variable of interest.

+(p<0.10), \*(p<0.05), \*\*(p<0.01), \*\*\*(p<0.001)

**Data Appendix 3a. Hypothesis testing: The effect of scope on the segment's value, logged variables.**

| DV: discrepancy<br>xtscc, fe; IVs logged | t=0                     |                         |                         | t+1                     |                         |                         | t+2                     |                         |                         | t+3                     |                         |                         |
|------------------------------------------|-------------------------|-------------------------|-------------------------|-------------------------|-------------------------|-------------------------|-------------------------|-------------------------|-------------------------|-------------------------|-------------------------|-------------------------|
| <b>number of<br/>integrators</b>         | -.0007***<br>(1.59E-04) |                         |                         | -.0006***<br>(1.28E-04) |                         |                         | -.0004*<br>(1.77E-04)   |                         |                         | -.0007***<br>(1.65E-04) |                         |                         |
| <b>proportion of<br/>integrators</b>     | 1.34E-05<br>(2.96E-04)  |                         |                         | 1.06E-05<br>(2.27E-04)  |                         |                         | -8.26E-06<br>(2.86E-04) |                         |                         | -2.10E-04<br>(2.71E-04) |                         |                         |
| <b>mean no. of<br/>segments</b>          | -0.0001<br>(3.34E-04)   |                         |                         | -0.0001<br>(3.31E-04)   |                         |                         | -0.0001<br>(4.39E-04)   |                         |                         | -0.0001<br>(5.15E-04)   |                         |                         |
| Herfindahl index of<br>sales             | .015***<br>(3.32E-03)   | .0144***<br>(3.24E-03)  | .0144***<br>(3.28E-03)  | .0126***<br>(2.50E-03)  | .0122***<br>(2.42E-03)  | .0122***<br>(2.44E-03)  | .0139***<br>(2.73E-03)  | .0137***<br>(2.78E-03)  | .0137***<br>(2.79E-03)  | .0174***<br>(2.72E-03)  | .0169***<br>(2.71E-03)  | .0169***<br>(2.74E-03)  |
| mean of R&D<br>expenses                  | -.0004**<br>(1.21E-04)  | -.0004**<br>(1.49E-04)  | -.0004**<br>(1.46E-04)  | -.0006***<br>(6.48E-05) | -.0006***<br>(5.57E-05) | -.0006***<br>(5.59E-05) | -.0006***<br>(7.83E-05) | -.0006***<br>(6.28E-05) | -.0006***<br>(6.51E-05) | -.0006***<br>(1.02E-04) | -.0006***<br>(9.88E-05) | -.0006***<br>(1.06E-04) |
| segment's mean of<br>fixed assets        | -0.0003<br>(2.57E-04)   | -0.0003<br>(2.85E-04)   | -0.0003<br>(2.77E-04)   | -0.0004<br>(3.09E-04)   | -0.0005<br>(3.46E-04)   | -0.0005<br>(3.38E-04)   | -.0008**<br>(2.77E-04)  | -.0008**<br>(2.97E-04)  | -.0008**<br>(2.92E-04)  | -.0011*<br>(4.25E-04)   | -.0012*<br>(4.43E-04)   | -.0012*<br>(4.45E-04)   |
| segment's mean of<br>entry cost          | -0.0001<br>(1.37E-04)   | -0.0001<br>(1.24E-04)   | -0.0001<br>(1.42E-04)   | .0002*<br>(6.86E-05)    | 0.0001<br>(6.29E-05)    | 8.72E-05<br>(8.36E-05)  | .0003***<br>(7.28E-05)  | .0002**<br>(7.62E-05)   | .0002***<br>(6.37E-05)  | .0003***<br>(8.38E-05)  | .0002**<br>(8.62E-05)   | .0002**<br>(8.50E-05)   |
| number of firms                          | .0007+<br>(3.43E-04)    | 0.0006<br>(3.82E-04)    | 0.0005<br>(4.08E-04)    | 0.0004<br>(2.72E-04)    | 0.0003<br>(2.81E-04)    | 0.0003<br>(3.18E-04)    | 0.0002<br>(1.36E-04)    | 0.0002<br>(1.52E-04)    | 0.0002<br>(1.63E-04)    | .0005*<br>(1.93E-04)    | .0004+<br>(2.07E-04)    | .0004+<br>(2.24E-04)    |
| segment's sum of<br>employees            | 0.0007<br>(4.73E-04)    | 0.0007<br>(5.25E-04)    | 0.0007<br>(5.35E-04)    | .001**<br>(3.23E-04)    | .001**<br>(3.69E-04)    | .001*<br>(3.80E-04)     | .0013***<br>(2.07E-04)  | .0013***<br>(2.29E-04)  | .0013***<br>(2.37E-04)  | .0016***<br>(2.62E-04)  | .0015***<br>(2.64E-04)  | .0015***<br>(2.46E-04)  |
| segment's mean of<br>asset efficiency    | -.001***<br>(2.49E-04)  | -.0011***<br>(2.61E-04) | -.0011***<br>(2.47E-04) | -.0013***<br>(3.44E-04) | -.0014***<br>(3.67E-04) | -.0013***<br>(3.44E-04) | -.0012***<br>(2.44E-04) | -.0013***<br>(2.56E-04) | -.0013***<br>(2.30E-04) | -.0013***<br>(2.89E-04) | -.0014***<br>(3.10E-04) | -.0014***<br>(2.98E-04) |
| constant                                 | -.0194***<br>(3.80E-03) | -.018***<br>(3.77E-03)  | -.018***<br>(3.85E-03)  | -.0164***<br>(2.70E-03) | -.0151***<br>(2.55E-03) | -.0151***<br>(2.58E-03) | -.0173***<br>(2.78E-03) | -.0164***<br>(2.83E-03) | -.0164***<br>(2.87E-03) | -.0212***<br>(3.04E-03) | -.0197***<br>(2.96E-03) | -.0197***<br>(3.00E-03) |
| N                                        | 573                     |                         |                         | 545                     |                         |                         | 516                     |                         |                         | 487                     |                         |                         |
| F                                        | 23.201                  |                         |                         | 42.614                  |                         |                         | 54.422                  |                         |                         | 58.423                  |                         |                         |
| P>F                                      | 0.000                   |                         |                         | 0.000                   |                         |                         | 0.000                   |                         |                         | 0.000                   |                         |                         |

Note. Variables in bold letters are the variables of interest.

+(p<0.10), \*(p<0.05), \*\*(p<0.01), \*\*\*(p<0.001)

**Data Appendix 3b. Hypothesis testing: The effect of scope on the segment's value, not logged variables.**

| DV: pct_mcap<br>IVs not logged     | t=0                             |                          |                                | t+1                             |                         |                                | t+2                             |                          |                                | t+3                            |                         |                                |
|------------------------------------|---------------------------------|--------------------------|--------------------------------|---------------------------------|-------------------------|--------------------------------|---------------------------------|--------------------------|--------------------------------|--------------------------------|-------------------------|--------------------------------|
| <b>number of integrators</b>       | <b>-0.0012***</b><br>(2.82E-04) |                          |                                | <b>-0.0011***</b><br>(2.89E-04) |                         |                                | <b>-0.0013***</b><br>(3.05E-04) |                          |                                | <b>-0.0009**</b><br>(3.14E-04) |                         |                                |
| <b>proportion of integrators</b>   | <b>-7.47E-03</b><br>(8.86E-03)  |                          |                                | <b>-7.83E-03</b><br>(9.39E-03)  |                         |                                | <b>-7.55E-03</b><br>(1.00E-02)  |                          |                                | <b>-3.62E-03</b><br>(1.04E-02) |                         |                                |
| <b>mean no. of segments</b>        |                                 |                          | <b>-5.44E-03</b><br>(5.89E-03) |                                 |                         | <b>-4.56E-03</b><br>(6.28E-03) |                                 |                          | <b>-3.26E-03</b><br>(6.82E-03) |                                |                         | <b>-1.84E-03</b><br>(7.24E-03) |
| Herfindahl index of sales          | 6.87E-03<br>(1.21E-02)          | 7.94E-03<br>(1.26E-02)   | 7.25E-03<br>(1.24E-02)         | 6.03E-03<br>(1.28E-02)          | 6.58E-03<br>(1.33E-02)  | 5.65E-03<br>(1.31E-02)         | 1.66E-03<br>(1.34E-02)          | 1.92E-03<br>(1.39E-02)   | 6.45E-04<br>(1.38E-02)         | -5.69E-03<br>(1.38E-02)        | -6.48E-03<br>(1.42E-02) | -6.97E-03<br>(1.40E-02)        |
| mean of R&D expenses               | 3.08E-05<br>(4.38E-05)          | 3.57E-05<br>(4.47E-05)   | 3.67E-05<br>(4.47E-05)         | 2.79E-05<br>(4.82E-05)          | 3.34E-05<br>(4.91E-05)  | 3.46E-05<br>(4.93E-05)         | 1.77E-05<br>(5.09E-05)          | 2.12E-05<br>(5.20E-05)   | 2.18E-05<br>(5.23E-05)         | 2.42E-05<br>(5.20E-05)         | 2.69E-05<br>(5.25E-05)  | 2.77E-05<br>(5.28E-05)         |
| segment's mean of fixed assets     | -7.06E-06<br>(6.65E-06)         | -7.36E-06<br>(6.75E-06)  | -7.57E-06<br>(6.76E-06)        | -5.85E-06<br>(6.94E-06)         | -6.20E-06<br>(7.04E-06) | -6.46E-06<br>(7.05E-06)        | -3.42E-06<br>(7.31E-06)         | -3.70E-06<br>(7.45E-06)  | -3.95E-06<br>(7.46E-06)        | -3.34E-06<br>(7.55E-06)        | -3.58E-06<br>(7.62E-06) | -3.74E-06<br>(7.63E-06)        |
| segment's mean of entry cost       | -6.96E-07<br>(3.22E-06)         | -7.33E-07<br>(3.27E-06)  | -4.98E-07<br>(3.29E-06)        | -6.93E-07<br>(3.32E-06)         | -7.03E-07<br>(3.37E-06) | -5.47E-07<br>(3.38E-06)        | -8.40E-07<br>(4.63E-06)         | -1.05E-06<br>(4.72E-06)  | -9.92E-07<br>(4.74E-06)        | -8.11E-07<br>(4.60E-06)        | -9.96E-07<br>(4.64E-06) | -9.65E-07<br>(4.65E-06)        |
| number of firms                    | .0003***<br>(6.20E-05)          | .0003***<br>(6.12E-05)   | .0003***<br>(6.11E-05)         | .0004***<br>(6.41E-05)          | .0003***<br>(6.35E-05)  | .0003***<br>(6.35E-05)         | .0005***<br>(6.64E-05)          | .0004***<br>(6.55E-05)   | .0004***<br>(6.55E-05)         | .0005***<br>(6.78E-05)         | .0005***<br>(6.64E-05)  | .0005***<br>(6.64E-05)         |
| segment's sum of employees         | 7.22e-05**<br>(2.49E-05)        | 6.74e-05**<br>(2.53E-05) | 6.78e-05**<br>(2.53E-05)       | 1.42E-05<br>(2.77E-05)          | 5.84E-06<br>(2.81E-05)  | 6.06E-06<br>(2.81E-05)         | -7.44e-05*<br>(3.02E-05)        | -7.72e-05*<br>(3.08E-05) | -7.68e-05*<br>(3.08E-05)       | -.0002***<br>(3.28E-05)        | -.0002***<br>(3.30E-05) | -.0002***<br>(3.30E-05)        |
| segment's mean of asset efficiency | -2.23E-05<br>(1.02E-04)         | -2.29E-05<br>(1.03E-04)  | -2.18E-05<br>(1.03E-04)        | -1.40E-05<br>(1.04E-04)         | -1.42E-05<br>(1.05E-04) | -1.29E-05<br>(1.05E-04)        | -9.68E-06<br>(1.05E-04)         | -9.15E-06<br>(1.07E-04)  | -7.45E-06<br>(1.07E-04)        | -5.45E-07<br>(1.05E-04)        | 1.16E-06<br>(1.06E-04)  | 1.80E-06<br>(1.06E-04)         |
| constant                           | .0265***<br>(8.01E-03)          | .0286***<br>(8.23E-03)   | .0353**<br>(1.17E-02)          | .0329***<br>(8.36E-03)          | .0355***<br>(8.60E-03)  | .0408**<br>(1.24E-02)          | .044***<br>(8.72E-03)           | .0463***<br>(8.99E-03)   | .0499***<br>(1.31E-02)         | .0567***<br>(9.02E-03)         | .0588***<br>(9.20E-03)  | .061***<br>(1.38E-02)          |
| N                                  | 573                             | 573                      | 573                            | 537                             | 537                     | 537                            | 504                             | 504                      | 504                            | 473                            | 473                     | 473                            |
| F                                  | 11.43                           | 9.136                    | 9.156                          | 8.409                           | 6.376                   | 6.353                          | 7.685                           | 5.295                    | 5.249                          | 7.598                          | 6.544                   | 6.536                          |
| P>F                                | 0.000                           | 0.000                    | 0.000                          | 0.000                           | 0.000                   | 0.000                          | 0.000                           | 0.000                    | 0.000                          | 0.000                          | 0.000                   | 0.000                          |

Note. Variables in bold letters are the variables of interest.

+(p<0.10), \*(p<0.05), \*\*(p<0.01), \*\*\*(p<0.001)

**Data Appendix 4a. Robustness test of the importance of concentration: Using the Herfindahl index of R&D (as opposed to share of kingpin) as an independent variable, logged and not logged variables.**

| Pct_mcap<br>IVs not logged         | xtreg, fe                 |                           |                           |                           | Discrepancy<br>IVs logged          | xtscc, fe               |                         |                         |                         |
|------------------------------------|---------------------------|---------------------------|---------------------------|---------------------------|------------------------------------|-------------------------|-------------------------|-------------------------|-------------------------|
|                                    | t=0                       | t+1                       | t+2                       | t+3                       |                                    | t=0                     | t+1                     | t+2                     | t+3                     |
| <b>Herfindahl index of R&amp;D</b> | 0.009<br>(0.01)           | 0.008<br>(0.01)           | 0.004<br>(0.01)           | 0.003<br>(0.01)           | <b>Herfindahl index of R&amp;D</b> | .0019+<br>(9.37E-04)    | .002+<br>(1.16E-03)     | .0023*<br>(8.67E-04)    | .0032***<br>(8.80E-04)  |
| Herfindahl index of sales          | -3.42E-04<br>(0.01)       | -0.001<br>(0.02)          | -0.003<br>(0.02)          | -0.009<br>(0.02)          | Herfindahl index of sales          | .0123***<br>(3.03E-03)  | .0098***<br>(2.09E-03)  | .0108***<br>(2.02E-03)  | .013***<br>(1.97E-03)   |
| mean of R&D expenses               | 3.10E-05<br>(4.44E-05)    | 2.92E-05<br>(4.89E-05)    | 1.86E-05<br>(5.19E-05)    | 2.61E-05<br>(5.25E-05)    | mean of R&D expenses               | -.0004*<br>(1.60E-04)   | -.0006***<br>(5.82E-05) | -.0006***<br>(5.82E-05) | -.0006***<br>(1.12E-04) |
| segment's mean of fixed assets     | -7.23E-06<br>(6.75E-06)   | -6.10E-06<br>(7.04E-06)   | -3.73E-06<br>(7.46E-06)   | -3.60E-06<br>(7.62E-06)   | segment's mean of fixed assets     | -4.29E-04<br>(3.10E-04) | -0.001<br>(3.79E-04)    | -.001**<br>(3.07E-04)   | -.0014**<br>(4.43E-04)  |
| segment's mean of entry cost       | -9.95E-07<br>(3.28E-06)   | -9.45E-07<br>(3.37E-06)   | -1.31E-06<br>(4.74E-06)   | -1.17E-06<br>(4.67E-06)   | segment's mean of entry cost       | -0.0001<br>(1.24E-04)   | 0.0001<br>(7.03E-05)    | .0003***<br>(6.16E-05)  | .0003**<br>(9.37E-05)   |
| number of firms                    | 2.80E-04***<br>(6.14E-05) | 3.33E-04***<br>(6.38E-05) | 3.97E-04***<br>(6.58E-05) | 4.63E-04***<br>(6.68E-05) | number of firms                    | 0.0006<br>(3.66E-04)    | 0.0003<br>(2.77E-04)    | 0.0002<br>(1.34E-04)    | .0005*<br>(1.93E-04)    |
| segment's sum of employees         | 6.78E-05**<br>(2.53E-05)  | 6.04E-06<br>(2.81E-05)    | -7.69E-05*<br>(3.08E-05)  | 1.69E-04***<br>(3.30E-05) | segment's sum of employees         | 0.0008<br>(5.65E-04)    | .0011*<br>(4.17E-04)    | .0014***<br>(2.63E-04)  | .0016***<br>(2.57E-04)  |
| segment's mean of asset efficiency | -1.40E-05<br>(1.04E-04)   | -6.35E-06<br>(1.06E-04)   | -3.87E-06<br>(1.07E-04)   | 4.17E-06<br>(1.06E-04)    | segment's mean of asset efficiency | -.001***<br>(2.15E-04)  | -.0013***<br>(2.98E-04) | -.0012***<br>(1.95E-04) | -.0013***<br>(2.56E-04) |
| constant                           | .0249**<br>(0.01)         | .0321***<br>(0.01)        | .0441***<br>(0.01)        | .0575***<br>(0.01)        | constant                           | -.016***<br>(3.75E-03)  | -.0128***<br>(2.68E-03) | -.0137***<br>(2.28E-03) | -.0158***<br>(2.48E-03) |
| N                                  | 573                       | 537                       | 504                       | 473                       | N                                  | 573                     | 545                     | 516                     | 487                     |
| F                                  | 9.10                      | 6.32                      | 5.23                      | 6.53                      | F                                  | 31.69                   | 34.81                   | 42.40                   | 87.25                   |
| P>F                                | 0.000                     | 0.000                     | 0.000                     | 0.000                     | P>F                                | 0.000                   | 0.000                   | 0.000                   | 0.000                   |

Note. 'Herfindahl index of R&D' is the variable of interest.

+(p<0.10), \*(p<0.05), \*\*(p<0.01), \*\*\*(p<0.001)

**Data appendix 4b. Robustness test of the importance of concentration: Using the Herfindahl index of market capitalization (as opposed to share of kingpin) as an independent variable, logged and not logged variables.**

| DV: Pct_mcap<br>IVs not logged        | xtreg, fe  |            |            |            | DV: Discrepancy<br>IVs logged         | xtscc, fe    |              |              |              |
|---------------------------------------|------------|------------|------------|------------|---------------------------------------|--------------|--------------|--------------|--------------|
|                                       | t=0        | t+1        | t+2        | t+3        |                                       | t=0          | t+1          | t+2          | t+3          |
| <b>Herfindahl index of market cap</b> | .0296*     | .0303*     | .0258+     | 2.34E-02   | <b>Herfindahl index of market cap</b> | .0009*       | .0018*       | .0025***     | .0029***     |
|                                       | (1.34E-02) | (1.47E-02) | (1.52E-02) | (1.55E-02) |                                       | (3.60E-04)   | (7.24E-04)   | (5.18E-04)   | (6.39E-04)   |
| Herfindahl index of sales             | -0.0136    | -0.0156    | -0.0173    | -0.0228    | Herfindahl index of sales             | .0021***     | .0009*       | .0008**      | .001*        |
|                                       | (1.49E-02) | (1.61E-02) | (1.69E-02) | (1.72E-02) |                                       | (5.15E-04)   | (4.16E-04)   | (2.41E-04)   | (3.60E-04)   |
| mean of R&D expenses                  | 2.95E-05   | 2.81E-05   | 1.65E-05   | 2.35E-05   | mean of R&D expenses                  | -2.12e-06*** | -3.22e-06*** | -2.53e-06*** | -8.10E-07    |
|                                       | (4.43E-05) | (4.87E-05) | (5.18E-05) | (5.23E-05) |                                       | (5.49E-07)   | (5.50E-07)   | (6.52E-07)   | (1.01E-06)   |
| segment's mean of fixed assets        | -6.57E-06  | -5.80E-06  | -3.34E-06  | -3.14E-06  | segment's mean of fixed assets        | -1.53E-07    | 7.31E-09     | 2.90E-08     | -3.50E-08    |
|                                       | (6.73E-06) | (7.02E-06) | (7.44E-06) | (7.60E-06) |                                       | (1.50E-07)   | (9.97E-08)   | (9.87E-08)   | (7.49E-08)   |
| segment's mean of entry cost          | -1.04E-06  | -1.03E-06  | -1.87E-06  | -1.68E-06  | segment's mean of entry cost          | -9.75e-08*** | -8.94e-08*** | -1.53e-07*   | -1.26e-07*   |
|                                       | (3.26E-06) | (3.35E-06) | (4.72E-06) | (4.65E-06) |                                       | (2.56E-08)   | (2.13E-08)   | (5.68E-08)   | (4.95E-08)   |
| number of firms                       | .0003***   | .0003***   | .0004***   | .0005***   | number of firms                       | -5.49E-06    | 3.99E-06     | 1.2e-05*     | 2.33e-05***  |
|                                       | (6.08E-05) | (6.32E-05) | (6.52E-05) | (6.62E-05) |                                       | (6.11E-06)   | (5.53E-06)   | (5.17E-06)   | (6.18E-06)   |
| segment's sum of employees            | .0001**    | 9.29E-06   | -.0001*    | -.0002***  | segment's sum of employees            | 1.56e-05*    | 1.06e-05+    | 5.56E-06     | -1.82E-06    |
|                                       | (2.52E-05) | (2.80E-05) | (3.07E-05) | (3.29E-05) |                                       | (6.58E-06)   | (6.08E-06)   | (6.04E-06)   | (6.53E-06)   |
| segment's mean of asset efficiency    | 6.47E-06   | 1.65E-05   | 1.76E-05   | 2.34E-05   | segment's mean of asset efficiency    | -3.49e-06*** | -2.12e-06**  | -2.01e-06*** | -2.40e-06*** |
|                                       | (1.03E-04) | (1.06E-04) | (1.07E-04) | (1.07E-04) |                                       | (7.56E-07)   | (7.76E-07)   | (3.39E-07)   | (4.86E-07)   |
| constant                              | .0204*     | .0273**    | .0395***   | .0533***   | constant                              | -.004***     | -.004***     | -.0037***    | -.0037***    |
|                                       | (8.72E-03) | (9.11E-03) | (9.47E-03) | (9.65E-03) |                                       | (8.45E-04)   | (8.75E-04)   | (8.52E-04)   | (7.91E-04)   |
| N                                     | 573        | 537        | 504        | 473        | N                                     | 573          | 545          | 516          | 487          |
| F                                     | 9.725      | 6.862      | 5.612      | 6.847      | F                                     | 108.098      | 95.625       | 83.551       | 66.231       |
| P>F                                   | 0.000      | 0.000      | 0.000      | 0.000      | P>F                                   | 0.000        | 0.000        | 0.000        | 0.000        |

Note. 'Herfindahl index of market cap' is the variable of interest.

+(p<0.10), \*(p<0.05), \*\*(p<0.01), \*\*\*(p<0.001)

**Data Appendix 5. Robustness check: The effect of inequality, excluding single-firm segments from the data.**

| Discrepancy<br>xtscc, IVs logged   | t=0                     |                        |                         |                        | t+1                     |                         |                         |                         | t+2                     |                         |                         |                         | t+3                     |                         |                         |                         |
|------------------------------------|-------------------------|------------------------|-------------------------|------------------------|-------------------------|-------------------------|-------------------------|-------------------------|-------------------------|-------------------------|-------------------------|-------------------------|-------------------------|-------------------------|-------------------------|-------------------------|
|                                    | Controls                | H2                     | H1                      | Full                   | Controls                | H2                      | H1                      | Full                    | Controls                | H2                      | H1                      | Full                    | Controls                | H2                      | H1                      | Full                    |
| kingpin's share (R&D)              |                         | .0045**<br>(1.40E-03)  |                         | .0045**<br>(1.51E-03)  |                         | .0048**<br>(1.63E-03)   |                         | .0043*<br>(1.70E-03)    |                         | .0052***<br>(1.37E-03)  |                         | .0045**<br>(1.55E-03)   |                         | .0065***<br>(1.38E-03)  |                         | .0055**<br>(1.53E-03)   |
| kingpin's share (market cap)       |                         |                        | 0.0013<br>(9.36E-04)    | 0.0001<br>(8.65E-04)   |                         |                         | .0035***<br>(7.15E-04)  | .0026***<br>(4.88E-04)  |                         |                         | .0047***<br>(9.76E-04)  | .0037***<br>(8.16E-04)  |                         |                         | .0056***<br>(1.29E-03)  | .0043***<br>(1.01E-03)  |
| Herfindahl index of sales          | .0162***<br>(3.74E-03)  | 0.0048<br>(2.98E-03)   | .0129***<br>(2.84E-03)  | .0045*<br>(2.02E-03)   | .0135***<br>(2.66E-03)  | 0.0007<br>(2.39E-03)    | .004*<br>(1.79E-03)     | -.0049+<br>(2.72E-03)   | .0154***<br>(3.04E-03)  | 0.0009<br>(9.06E-04)    | 0.003<br>(3.48E-03)     | -.007***<br>(1.35E-03)  | .0189***<br>(3.05E-03)  | 0.001<br>(8.80E-04)     | 0.004<br>(3.22E-03)     | -.0081***<br>(1.64E-03) |
| mean of R&D expenses               | -.0005**<br>(1.60E-04)  | -.0005**<br>(1.71E-04) | -.0005*<br>(1.74E-04)   | -.0005*<br>(1.92E-04)  | -.0007***<br>(1.06E-04) | -.0006***<br>(8.72E-05) | -.0005***<br>(9.05E-05) | -.0005***<br>(9.67E-05) | -.0007***<br>(1.03E-04) | -.0006***<br>(9.68E-05) | -.0004***<br>(8.95E-05) | -.0004***<br>(1.17E-04) | -.0006***<br>(1.12E-04) | -0.0004<br>(2.53E-04)   | -.0003*<br>(1.55E-04)   | -0.0002<br>(2.76E-04)   |
| segment's mean of fixed assets     | -0.0004<br>(3.31E-04)   | -0.0003<br>(6.06E-04)  | -0.0003<br>(3.22E-04)   | -0.0003<br>(6.18E-04)  | -0.0005<br>(3.91E-04)   | -0.0005<br>(6.47E-04)   | -0.0004<br>(3.51E-04)   | -0.0004<br>(6.47E-04)   | -.0008*<br>(3.20E-04)   | -.0012**<br>(3.78E-04)  | -.0007**<br>(2.48E-04)  | -.001**<br>(3.68E-04)   | -.0012*<br>(4.52E-04)   | -.0018***<br>(4.15E-04) | -.0011**<br>(3.68E-04)  | -.0018***<br>(3.73E-04) |
| segment's mean of entry cost       | -0.0002<br>(1.66E-04)   | -0.0001<br>(2.69E-04)  | -0.0002<br>(1.64E-04)   | -0.0001<br>(2.74E-04)  | 0.0001<br>(8.98E-05)    | 0.0001<br>(1.80E-04)    | 4.61E-05<br>(8.54E-05)  | 0.0001<br>(1.85E-04)    | .0002**<br>(8.47E-05)   | .0004***<br>(7.42E-05)  | 0.0001<br>(1.11E-04)    | .0003**<br>(8.13E-05)   | .0003*<br>(8.99E-05)    | .0004***<br>(1.03E-04)  | 0.0001<br>(1.03E-04)    | .0003**<br>(1.07E-04)   |
| number of firms                    | 0.0006<br>(4.74E-04)    | .0014*<br>(6.47E-04)   | 0.0008<br>(5.92E-04)    | .0015*<br>(7.00E-04)   | 0.0004<br>(3.62E-04)    | .0013*<br>(5.22E-04)    | .001*<br>(4.24E-04)     | .0016**<br>(5.24E-04)   | 0.0002<br>(1.89E-04)    | .001*<br>(3.93E-04)     | .0011**<br>(3.28E-04)   | .0015**<br>(4.46E-04)   | .0004+<br>(2.36E-04)    | .0014*<br>(5.23E-04)    | .0015**<br>(4.48E-04)   | .002**<br>(5.65E-04)    |
| segment's sum of employees         | 0.0008<br>(5.95E-04)    | 0.0007<br>(8.40E-04)   | 0.0007<br>(6.31E-04)    | 0.0006<br>(8.77E-04)   | .0011*<br>(3.91E-04)    | 0.0009<br>(6.32E-04)    | .0008+<br>(4.02E-04)    | 0.0007<br>(6.49E-04)    | .0014***<br>(2.48E-04)  | .0014**<br>(4.09E-04)   | .001***<br>(2.50E-04)   | .001*<br>(4.63E-04)     | .0016***<br>(2.94E-04)  | .0016***<br>(2.45E-04)  | .001***<br>(2.02E-04)   | .0012***<br>(2.94E-04)  |
| segment's mean of asset efficiency | -.0012***<br>(2.52E-04) | -.0006**<br>(1.99E-04) | -.0012***<br>(2.43E-04) | -.0006**<br>(2.04E-04) | -.0015***<br>(3.74E-04) | -.0007**<br>(2.44E-04)  | -.0013***<br>(2.73E-04) | -.0007***<br>(1.61E-04) | -.0015***<br>(2.59E-04) | -.0006**<br>(1.80E-04)  | -.0012***<br>(1.67E-04) | -.0005***<br>(1.28E-04) | -.0016***<br>(3.20E-04) | -0.0005<br>(3.15E-04)   | -.0013***<br>(1.96E-04) | -.0005**<br>(1.57E-04)  |
| constant                           | -.0201***<br>(4.41E-03) | -0.0059<br>(4.73E-03)  | -.0158***<br>(3.39E-03) | -0.0055<br>(3.72E-03)  | -.0171***<br>(2.87E-03) | -0.001<br>(4.89E-03)    | -.0047+<br>(2.53E-03)   | 0.0064<br>(5.54E-03)    | -.0188***<br>(3.02E-03) | 0.0006<br>(1.77E-03)    | -0.0024<br>(4.02E-03)   | .0112***<br>(2.04E-03)  | -.0223***<br>(3.26E-03) | .0027+<br>(1.47E-03)    | -0.0024<br>(4.62E-03)   | .0152***<br>(3.04E-03)  |
| N                                  | 482                     | 468                    | 481                     | 467                    | 465                     | 452                     | 464                     | 451                     | 445                     | 433                     | 444                     | 432                     | 424                     | 412                     | 423                     | 411                     |
| F                                  | 12.83                   | 7.15                   | 10.99                   | 6.30                   | 36.96                   | 16.29                   | 30.50                   | 33.25                   | 48.33                   | 19.17                   | 40.51                   | 43.54                   | 38.09                   | 27.61                   | 38.20                   | 29.62                   |
| p>F                                | 0                       | 0                      | 0                       | 0                      | 0                       | 0                       | 0                       | 0                       | 0                       | 0                       | 0                       | 0                       | 0                       | 0                       | 0                       | 0                       |

Note. 'Kingpin's share (R&D)' and 'kingpin's share (market cap)' are the variables of interest.

+(p<0.10), \*(p<0.05), \*\*(p<0.01), \*\*\*(p<0.001)

**Data Appendix 6. Robustness check: The effect of inequality on the fringe firms in a segment, excluding single-firm segments from the data.**

| A segment's share, excluding kingpin's xtsc, fe; IVs logged | t=0                  |                      |                      |                      | t+1                    |                        |                        |                        | t+2                    |                        |                        |                        | t+3                 |                      |                     |                      |
|-------------------------------------------------------------|----------------------|----------------------|----------------------|----------------------|------------------------|------------------------|------------------------|------------------------|------------------------|------------------------|------------------------|------------------------|---------------------|----------------------|---------------------|----------------------|
|                                                             | Controls             | H1a                  | H2                   | Full                 | Controls               | H1a                    | H2                     | Full                   | Controls               | H1a                    | H2                     | Full                   | Controls            | H1a                  | H2                  | Full                 |
| kingpin's share (R&D)                                       |                      | .082***<br>(0.01)    |                      | .083***<br>(0.01)    |                        | .083***<br>(0.01)      |                        | .084***<br>(0.01)      |                        | .073***<br>(0.01)      |                        | .074***<br>(0.01)      |                     | .078***<br>(0.01)    |                     | .08***<br>(0.01)     |
| kingpin's share (market cap)                                |                      |                      | .022+<br>(0.01)      | -0.004<br>(0.01)     |                        |                        | 0.021<br>(0.02)        | -0.005<br>(0.01)       |                        |                        | 0.016<br>(0.01)        | -0.006<br>(0.01)       |                     |                      | 0.02<br>(0.01)      | -0.005<br>(5.33E-03) |
| Herfindahl index of sales                                   | 0.031<br>(0.03)      | -.187**<br>(0.05)    | -0.025<br>(0.05)     | -.178**<br>(0.06)    | .04+<br>(0.02)         | -.191**<br>(0.05)      | -0.017<br>(0.06)       | -.182*<br>(0.07)       | .063*<br>(0.03)        | -.153**<br>(0.05)      | 0.017<br>(0.06)        | -.143*<br>(0.06)       | -0.002<br>(0.03)    | -.235***<br>(0.04)   | -.055+<br>(0.03)    | -.226***<br>(0.04)   |
| mean of R&D expenses                                        | -0.001<br>(0.01)     | -0.007<br>(4.08E-03) | -3.48E-04<br>(0.01)  | -.007+<br>(3.93E-03) | -.016***<br>(3.91E-03) | -.022***<br>(3.17E-03) | -.015***<br>(3.76E-03) | -.023***<br>(3.26E-03) | -.018***<br>(4.46E-03) | -.022***<br>(3.77E-03) | -.017***<br>(4.02E-03) | -.022***<br>(3.56E-03) | -.012+<br>(0.01)    | -.016*<br>(0.01)     | -0.011<br>(0.01)    | -.017*<br>(0.01)     |
| segment's mean of fixed assets                              | 0.007<br>(0.01)      | 0.023<br>(0.01)      | 0.007<br>(0.01)      | 0.024<br>(0.01)      | 0.006<br>(0.01)        | .023+<br>(0.01)        | 0.006<br>(0.01)        | .023+<br>(0.01)        | -0.003<br>(0.01)       | 0.001<br>(0.01)        | -0.004<br>(0.01)       | -0.001<br>(0.01)       | -3.95E-04<br>(0.01) | 0.008<br>(0.01)      | -3.42E-04<br>(0.01) | 0.008<br>(0.01)      |
| segment's mean of entry cost                                | -0.017*<br>(0.01)    | -0.019*<br>(0.01)    | -0.016*<br>(0.01)    | -.02*<br>(0.01)      | -0.010<br>(0.01)       | -0.012<br>(0.01)       | -0.009<br>(0.01)       | -0.012<br>(0.01)       | 0.004<br>(0.01)        | 0.005<br>(0.01)        | 0.004<br>(0.01)        | 0.005<br>(0.01)        | 0.007<br>(0.01)     | 0.006<br>(0.01)      | 0.007<br>(0.01)     | 0.006<br>(0.01)      |
| number of firms                                             | -0.007<br>(0.01)     | 0.013<br>(0.01)      | -0.004<br>(0.01)     | 0.014<br>(0.01)      | -0.016<br>(0.01)       | 0.004<br>(0.01)        | -0.013<br>(0.01)       | 0.003<br>(0.01)        | -.026+<br>(0.01)       | -0.014<br>(0.01)       | -.024*<br>(0.01)       | -0.016<br>(0.01)       | -.03*<br>(0.01)     | -0.013<br>(0.01)     | -.026*<br>(0.01)    | -0.013<br>(0.01)     |
| segment's sum of employees                                  | 0.004<br>(0.01)      | -0.003<br>(0.01)     | 0.002<br>(0.01)      | -0.003<br>(0.01)     | .021*<br>(0.01)        | 0.014<br>(0.01)        | .019*<br>(0.01)        | 0.015<br>(0.01)        | .027*<br>(0.01)        | .027*<br>(0.01)        | .026**<br>(0.01)       | .028*<br>(0.01)        | .022+<br>(0.01)     | 0.02<br>(0.01)       | .021+<br>(0.01)     | 0.02<br>(0.01)       |
| segment's mean of asset efficiency                          | -.007+<br>(3.27E-03) | .005+<br>(2.60E-03)  | -0.005<br>(2.99E-03) | .005+<br>(2.48E-03)  | -.009*<br>(3.79E-03)   | 0.003<br>(3.73E-03)    | -.008+<br>(3.63E-03)   | 0.003<br>(3.59E-03)    | -.011**<br>(3.06E-03)  | 0.001<br>(2.91E-03)    | -.01**<br>(2.88E-03)   | 0.001<br>(2.94E-03)    | 0.001<br>(4.11E-03) | .013**<br>(3.77E-03) | 0.003<br>(3.99E-03) | .013**<br>(3.63E-03) |
| constant                                                    | 0.083<br>(0.05)      | .304**<br>(0.09)     | .151+<br>(0.08)      | .29**<br>(0.10)      | 0.053<br>(0.04)        | .29**<br>(0.08)        | 0.124<br>(0.08)        | .277*<br>(0.10)        | 0.018<br>(0.04)        | .278**<br>(0.07)       | 0.078<br>(0.08)        | .268**<br>(0.09)       | .065*<br>(0.03)     | .333***<br>(0.07)    | .133*<br>(0.05)     | .321***<br>(0.08)    |
| N                                                           | 375                  | 364                  | 374                  | 363                  | 363                    | 352                    | 362                    | 351                    | 349                    | 338                    | 348                    | 337                    | 334                 | 323                  | 333                 | 322                  |
| F                                                           | 19.80                | 31.04                | 43.19                | 30.97                | 50.20                  | 24.50                  | 48.51                  | 34.91                  | 22.69                  | 16.25                  | 21.53                  | 29.40                  | 4.21                | 38.72                | 4.88                | 49.86                |
| p>F                                                         | 0.000                | 0.000                | 0.000                | 0.000                | 0.000                  | 0.000                  | 0.000                  | 0.000                  | 0.000                  | 0.000                  | 0.000                  | 0.000                  | 0.007               | 0.000                | 0.003               | 0.000                |

Note. 'Kingpin's share (R&D) and 'kingpin's share (market cap)' are the variables of interest.

+(p<0.10), \*(p<0.05), \*\*(p<0.01), \*\*\*(p<0.001)

**Data Appendix 7. Robustness check: The effect of a segment's share on the inequality within the segment, excluding single-firm segments.**

| DV: Kingpin's share (R&D)                   | IVs not logged, xtreg, fe |            |            | IVs logged, xtsc, fe |           |           | DV: Kingpin's share (mcap)                  | IVs not logged, xtreg, fe |            |            | IVs logged, xtsc, fe |            |            |
|---------------------------------------------|---------------------------|------------|------------|----------------------|-----------|-----------|---------------------------------------------|---------------------------|------------|------------|----------------------|------------|------------|
|                                             | t+1                       | t+2        | t+3        | t+1                  | t+2       | t+3       |                                             | t+1                       | t+2        | t+3        | t+1                  | t+2        | t+3        |
| <b>segment's share of value in a sector</b> | .2492*                    | 0.1868     | 0.1559     | 1.5052*              | 1.5057**  | 2.5687*   | <b>segment's share of value in a sector</b> | .3259**                   | .213+      | 0.1547     | 1.3668               | 1.4169+    | 2.0363     |
|                                             | (0.12)                    | (0.12)     | (0.13)     | (0.62)               | (0.54)    | (1.13)    |                                             | (0.12)                    | (0.13)     | (0.14)     | (0.81)               | (0.73)     | (1.32)     |
| Herfindahl index of sales                   | .4002***                  | .358***    | .2701***   | 1.1689***            | .9905***  | .7349***  | Herfindahl index of sales                   | .4446***                  | .3726***   | .3048***   | 1.2933***            | 1.1133***  | .9719***   |
|                                             | (0.04)                    | (0.04)     | (0.05)     | (0.21)               | (0.14)    | (0.17)    |                                             | (0.04)                    | (0.04)     | (0.05)     | (0.15)               | (0.06)     | (0.06)     |
| mean of R&D expenses                        | -.0003*                   | -.0004**   | -.0004**   | -0.013               | -.008*    | -0.0033   | mean of R&D expenses                        | 4.39E-06                  | -1.11E-04  | -6.66E-05  | -1.13E-02            | .0277***   | .0593***   |
|                                             | (1.29E-04)                | (1.39E-04) | (1.47E-04) | (0.01)               | (0.00)    | (0.01)    |                                             | (1.33E-04)                | (1.43E-04) | (1.54E-04) | (7.45E-03)           | (0.01)     | (0.01)     |
| segment's mean of fixed assets              | 2.53E-05                  | 4.66e-05*  | 5.19e-05*  | -0.001               | -0.009    | 0.005     | segment's mean of fixed assets              | -4.83E-06                 | 1.14E-05   | 1.44E-05   | -0.0015              | 0.009      | 0.0133     |
|                                             | (1.90E-05)                | (2.01E-05) | (2.11E-05) | (0.01)               | (0.02)    | (0.01)    |                                             | (1.97E-05)                | (2.05E-05) | (2.21E-05) | (8.57E-03)           | (6.58E-03) | (9.97E-03) |
| segment's mean of entry cost                | 1.28E-05                  | 1.08E-05   | .0001+     | .0262*               | .0419**   | .0474**   | segment's mean of entry cost                | 7.37E-06                  | 1.66E-05   | -4.94E-06  | -0.0024              | -.0311+    | -.0458*    |
|                                             | (9.19E-06)                | (1.68E-05) | (6.45E-05) | (0.01)               | (0.01)    | (0.01)    |                                             | (8.93E-06)                | (1.30E-05) | (1.38E-05) | (0.01)               | (0.02)     | (0.02)     |
| number of firms                             | -.0006**                  | -.0005**   | -.0004*    | -.0906***            | -.0979*** | -.0781*** | number of firms                             | -2.83E-06                 | 5.37E-05   | 1.87E-04   | -.0575***            | -0.0073    | .0284*     |
|                                             | (1.69E-04)                | (1.78E-04) | (1.95E-04) | (0.01)               | (0.01)    | (0.01)    |                                             | (1.70E-04)                | (1.82E-04) | (1.98E-04) | (0.01)               | (0.01)     | (0.01)     |
| segment's sum of employees                  | 4.30E-05                  | 2.92E-05   | -3.80E-05  | 0.019                | .0149*    | -0.0062   | segment's sum of employees                  | -.0001+                   | -1.35E-04  | -.0002+    | .0145*               | -.0364***  | -.0774***  |
|                                             | (7.31E-05)                | (8.12E-05) | (9.13E-05) | (0.01)               | (0.01)    | (0.01)    |                                             | (7.35E-05)                | (8.32E-05) | (9.50E-05) | (0.01)               | (0.01)     | (0.02)     |
| segment's mean of asset efficiency          | -4.51E-04                 | -3.60E-04  | -2.49E-04  | -.043***             | -.0161+   | -.0233+   | segment's mean of asset efficiency          | -0.0003                   | -.0005+    | -0.0004    | -0.013               | -0.0246    | -0.0323    |
|                                             | (2.75E-04)                | (2.84E-04) | (2.94E-04) | (0.01)               | (0.01)    | (0.01)    |                                             | (2.76E-04)                | (2.89E-04) | (3.06E-04) | (0.02)               | (0.03)     | (0.02)     |
| constant                                    | .4719***                  | .4941***   | .5081***   | -.7912**             | -.6045**  | -.4328+   | constant                                    | .4205***                  | .4579***   | .494***    | -.9084***            | -.6581***  | -.5029***  |
|                                             | (0.02)                    | (0.03)     | (0.03)     | (0.22)               | (0.17)    | (0.24)    |                                             | (0.02)                    | (0.03)     | (0.03)     | (0.21)               | (0.07)     | (0.08)     |
| N                                           | 444                       | 418        | 396        | 444                  | 421       | 400       | N                                           | 461                       | 438        | 416        | 461                  | 441        | 420        |
| F                                           | 18.299                    | 14.199     | 7.999      | 227.026              | 161.338   | 60.99     | F                                           | 18.562                    | 11.058     | 6.718      | 453.561              | 154.479    | 86.724     |
| P>F                                         | 0.000                     | 0.000      | 0.000      | 0.000                | 0.000     | 0.000     | P>F                                         | 0.000                     | 0.000      | 0.000      | 0.000                | 0.000      | 0.000      |

Note. 'Segment's share of value in a sector' is the variable of interest.

+(p<0.10), \*(p<0.05), \*\*(p<0.01), \*\*\*(p<0.001)

**Data Appendix 8. Additional analysis. How a segment's share of value affects entry and exit.**

| No_firms<br>IVs logged                | t+1                  | t+2                  | t+3                  |
|---------------------------------------|----------------------|----------------------|----------------------|
| <b>Segment's share<br/>(mcap)</b>     | .6525***<br>(0.15)   | .8648***<br>(0.19)   | 1.0076***<br>(0.23)  |
| <b>kingpin's share<br/>(mcap)</b>     | -0.0367<br>(0.04)    | -0.0726<br>(0.05)    | -.12*<br>(0.06)      |
| <b>kingpin's share<br/>(R&amp;D)</b>  | -.1027*<br>(0.04)    | 0.0075<br>(0.05)     | 0.0856<br>(0.06)     |
| Herfindahl index of<br>sales          | -2.4511***<br>(0.47) | -2.7581***<br>(0.56) | -2.9187***<br>(0.63) |
| mean of R&D<br>expenses               | -.0728+<br>(0.04)    | -0.0062<br>(0.05)    | 0.0251<br>(0.06)     |
| segment's mean of<br>fixed assets     | -.6815***<br>(0.05)  | -.6194***<br>(0.07)  | -.5392***<br>(0.08)  |
| segment's mean of<br>entry cost       | .5331***<br>(0.03)   | .4499***<br>(0.03)   | .3429***<br>(0.04)   |
| segment's sum of<br>employees         | .5804***<br>(0.03)   | .4519***<br>(0.03)   | .3671***<br>(0.04)   |
| segment's mean of<br>asset efficiency | .2158***<br>(0.04)   | .2094***<br>(0.04)   | .1904***<br>(0.05)   |
| constant                              | 5.2957***<br>(0.61)  | 5.498***<br>(0.72)   | 5.7163***<br>(0.83)  |
| chi2                                  | 2212.702             | 1163.808             | 677.653              |
| F                                     | 516                  | 484                  | 452                  |
| P>F                                   | 0.000                | 0.000                | 0.000                |

Note. Results obtained by using 'xtnbreg, fe' command in Stata. Variables in bold characters are the independent variables of interest.

+(p<0.10), \*(p<0.05), \*\*(p<0.01), \*\*\*(p<0.000)

**Data appendix 9: Additional Figures and Graphs**

Figure 1. Graphic illustration of the evolution of computer OEMs

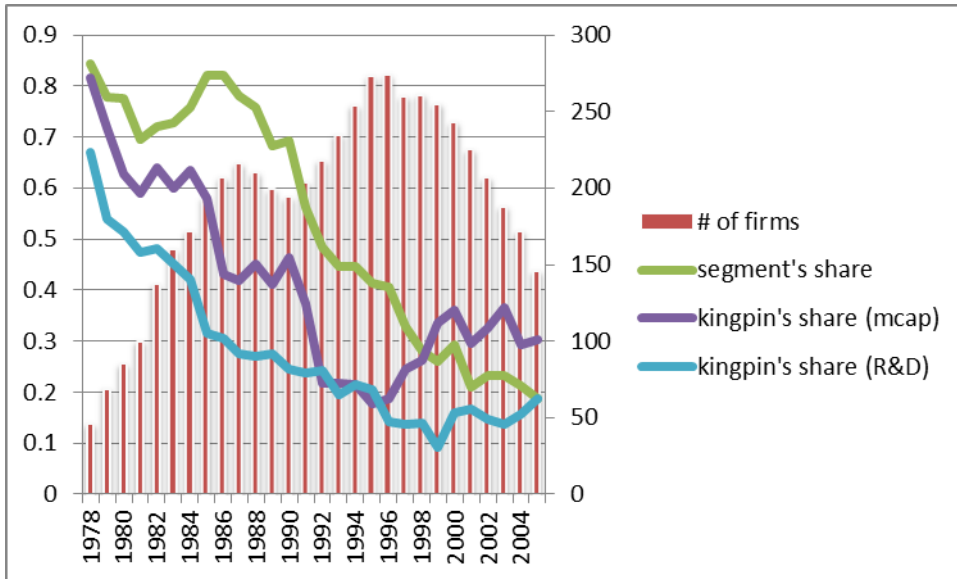

Figure 2. Graphic illustration of the evolution of software publishers

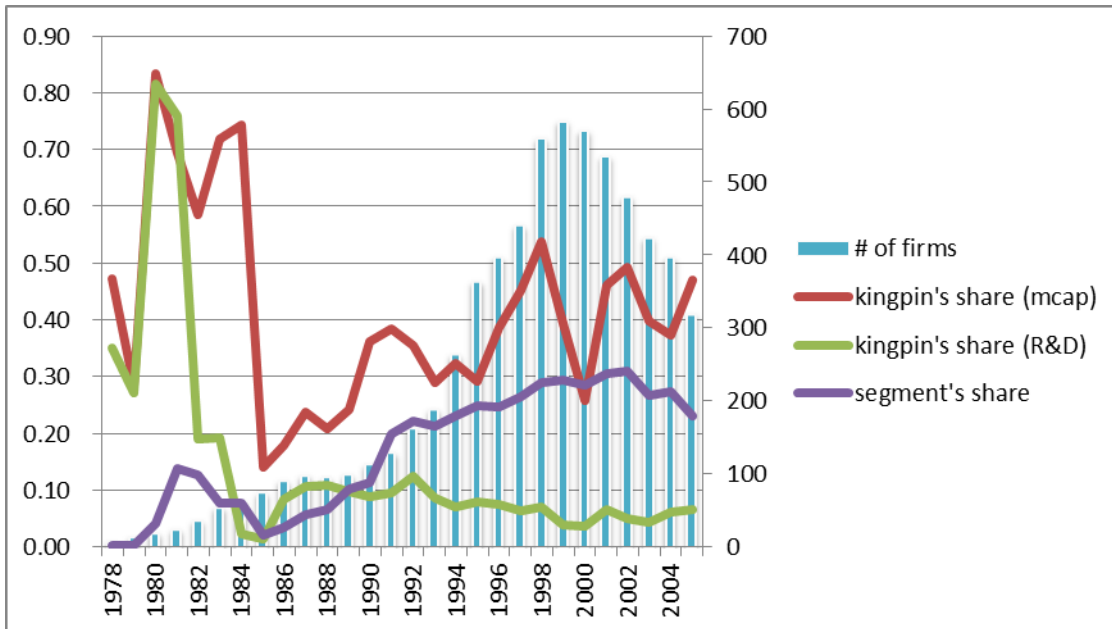

Figure 3. Graphic illustration of the evolution of microprocessor manufacturers

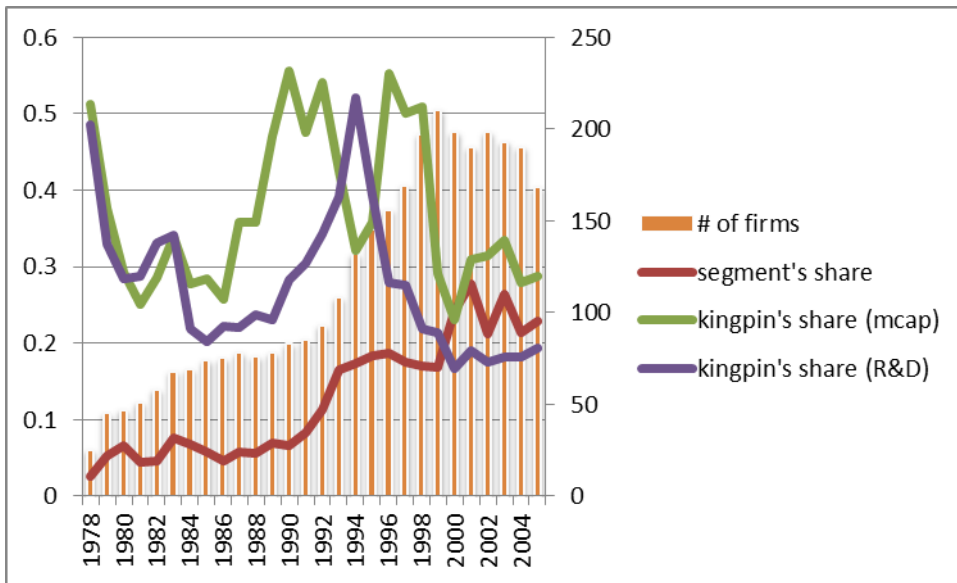

Figure 4. Graphic illustration of the evolution of data storage device manufacturers

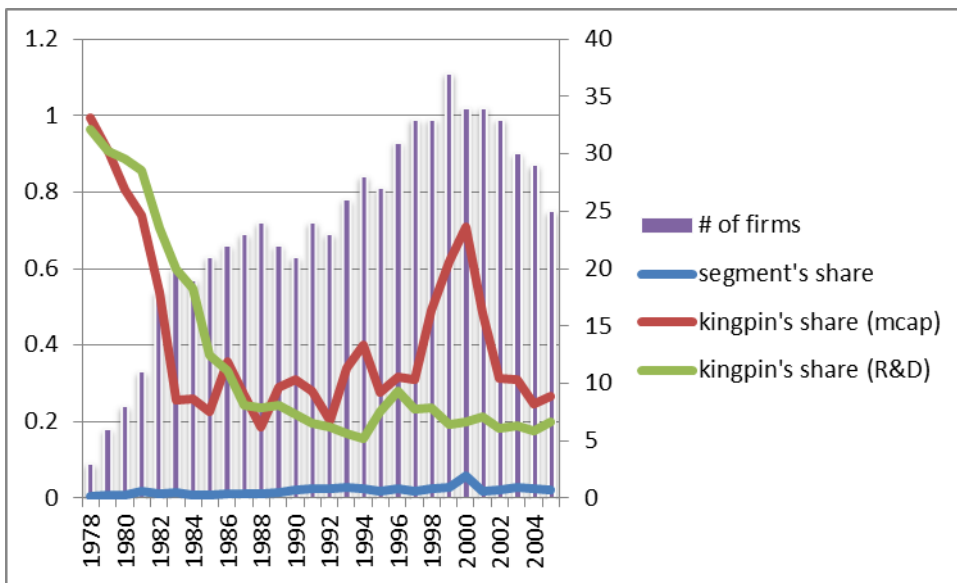

**Data Appendix 11: The comparison between kingpin's share and that of all others', in value, over time**

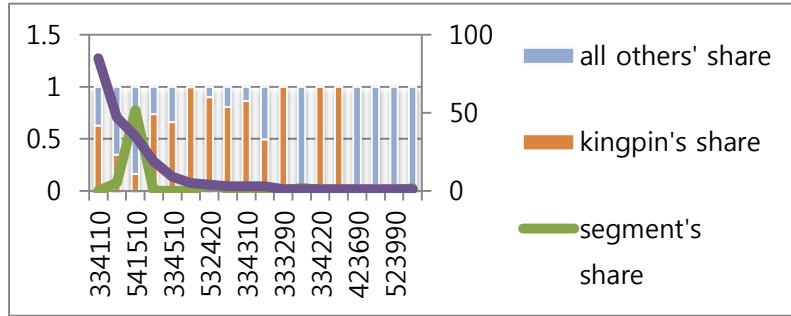

Year 1980

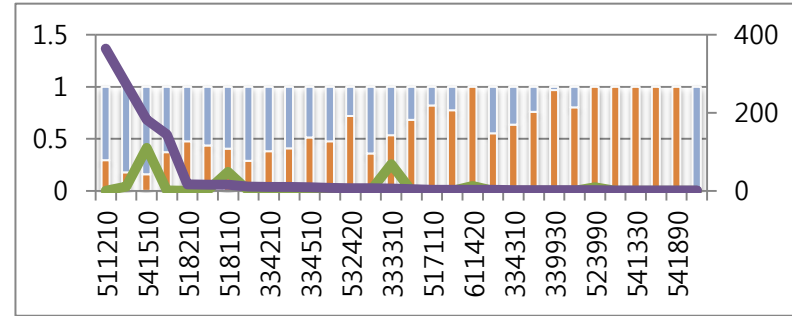

Year 1995

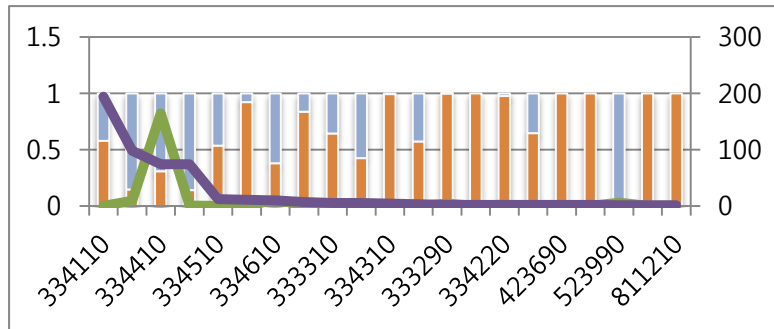

Year 1985

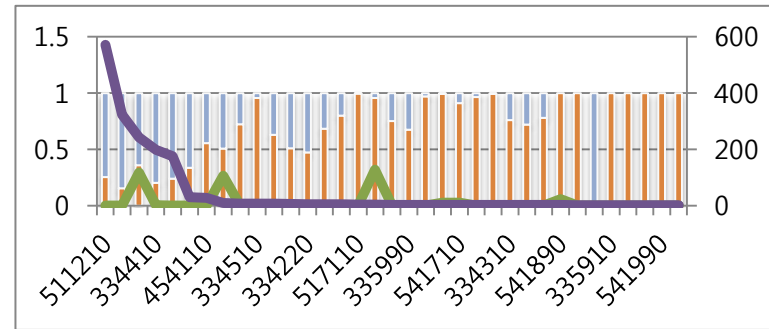

Year 2000

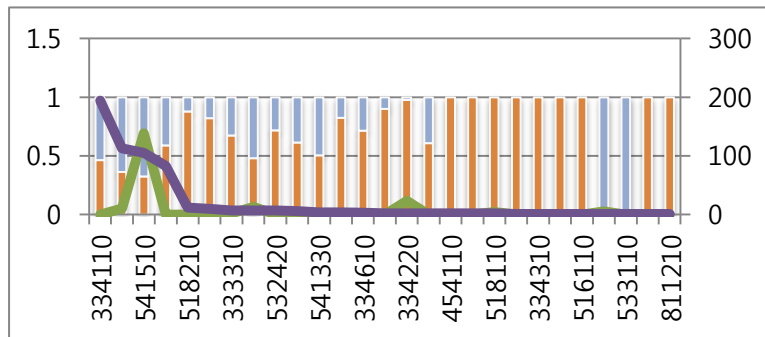

Year 1990

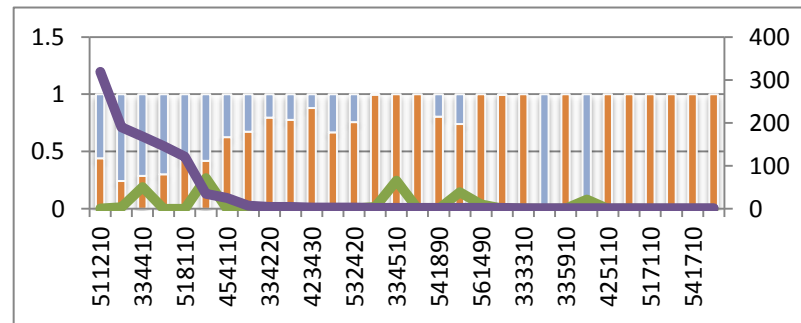

Year 2005
